# Supplementary material for: Estrogenic-dependent glutamatergic neurotransmission from kisspeptin neurons governs feeding circuits in females
Source: eLife journal article supplement (doi:10.7554/elife.35656), 2018-08-06
Supplement: supp [file elife-35656-supp-v1.zip]

Archive with 14 entries (14 files):
- elife_poa_e35656_Figure_5_source_data_1.xlsx
- elife_poa_e35656_Figure_8_source_data_1.xlsx
- elife_poa_e35656_Figure_7_source_data_1.xlsx
- elife_poa_e35656_Figure_6_source_data_1.xlsx
- elife_poa_e35656_Figure_9_source_data_1.xlsx
- elife_poa_e35656_Figure_2_source_data_1.xlsx
- elife_poa_e35656_Figure_3_source_data_1.xlsx
- elife_poa_e35656_Figure_15_figure_supplement_1.tif
- elife_poa_e35656_Figure_1_source_data_1.xlsx
- elife_poa_e35656_Transparent_Reporting_File.pdf
- elife_poa_e35656_Figure_10_source_data_1.xlsx
- elife_poa_e35656_Figure_11_source_data_1.xlsx
- elife_poa_e35656_Figure_15_figure_supplement_1_source_data_1.xlsx
- elife_poa_e35656_Figure_15_source_data_1.xlsx
