# Supplementary material for: Estrogenic-dependent glutamatergic neurotransmission from kisspeptin neurons governs feeding circuits in females
Source: eLife journal article supplement (doi:10.7554/elife.35656), 2018-08-06
Supplement: supp [file elife-35656-supp-v1.zip › elife_poa_e35656_Figure_1_source_data_1.xlsx]

## Sheet: Figure 1
OVX + Oil Gene comparisons
Fold change generated using OVX+Oil Tacr3 as calibrator
Pdyn	Tac2	Kiss1	Tacr3	Slc17a6
7.344	65.672	8.463	1.215	0.736
7.718	68.088	5.279	1.125	0.649
5.056	50.191	6.095	1.172	0.524
5.381	48.013		0.676	0.634
	53.505			0.581
				0.552
				0.538
6.37475	57.0938	6.61233	1.047	0.602	mean
0.726104	4.04529	0.333131	0.136904	0.0195385	SEM
OVX + E2 Gene comparisons
Pdyn	Tac2	Kiss1	Tacr3	Slc17a6
2.345	26.463	0.837	0.203	1.308
2.905	28.856	0.102	0.082	1.016
2.978	26.018	0.02	0.146	0.786
1.79	10.462	0.155	0.089	1.04
1.454	10.987	0.737		0.77
				0.904
				0.839
2.2944	20.5572	0.3702	0.13	0.951857	mean
0.346429	4.3472	0.146276	0.0175523	0.0435403	SEM
