# Supplementary material for: Estrogenic-dependent glutamatergic neurotransmission from kisspeptin neurons governs feeding circuits in females
Source: eLife journal article supplement (doi:10.7554/elife.35656), 2018-08-06
Supplement: supp [file elife-35656-supp-v1.zip › elife_poa_e35656_Figure_2_source_data_1.xlsx]

## Sheet: Figure 2A
Cacna1g, Hcn1, Hcn2, Kiss1 and Pdyn expression in Kiss1-ARH neurons
Data expressed in Fold Change
	Cacna1g	n=6
Animal #	OVX+Oil	OVX+E2
1	1.098	2.833
2	1.014	3.811
3	0.959	3.406
4	1.275	3.965
5	1.178	2.182
6	1.086	2.179
	1.10167	3.06267	mean
	0.0462491	0.321521	SEM
	Hcn1	n=5
Animal #	OVX+Oil	OVX+E2
1	1.098	2.833
2	1.014	3.811
3	0.959	3.406
4	1.275	3.965
5	1.178	2.182
	1.1048	3.2394	mean
	0.0565132	0.328955	SEM
	Hcn2	n=5
Animal #	OVX+Oil	OVX+E2
1	0.98	2.276
2	1.156	1.979
3	0.972	1.568
4	1.251	1.225
5	0.948	1.556
	1.0614	1.7208	mean
	0.0601561	0.183199	SEM
	Kiss1	n=5
Animal #	OVX+Oil	OVX+E2
1	1.13	0.111
2	1.555	0.014
3	0.705	0.003
4	0.814	0.021
5	0.892	0.098
	1.0192	0.0494	mean
	0.151057	0.0227697	SEM

## Sheet: Figure 2B
T-type calcium current and h-current density (pA/pF) in Kiss1ARH neurons from OVX oil- and E2-treated mice
Cell #	oIL, IT	E2, IT	oIL, IH	E2, IH
1	0	1.21951	0	2.5
2	0	1.23529	0	1.35294
3	0.314961	1.21212	0.07874	1.74242
4	0.185185	2.01087	0.432099	2.66304
5	0	0.56338	0	0.704225
6	0	1.25	0	1.40625
7	0.082645	0.201342	0.289256	0.671141
8	0	0.888889	0.121951	1.11111
9	0	1.13636	0	2.34849
10	0		0
11	0		0
12	0		0
	0.04857	1.08	0.07684	1.611	Mean
	0.02913	0.1681	0.04088	0.2506	SEM

## Sheet: Figure 2C
Summary data of rebound burst firing in Kiss1ARH neurons from oil- versus E2-treated females
Cell #	Oil	E2
1	0	1
2	0	2
3	0	2
4	0	1
5	1	1
6	0	3
7	0	1
8	0	2
9	0	2
10	3	1
11		1
12		3
13		2
14		1
15		1
16		1
17		2
18		2
19		4
20		2
21		3
22		2
23		3
24		3
25		4
	0.4	2	Mean
	0.3055	0.1915	SEM
