# Supplementary material for: Estrogenic-dependent glutamatergic neurotransmission from kisspeptin neurons governs feeding circuits in females
Source: eLife journal article supplement (doi:10.7554/elife.35656), 2018-08-06
Supplement: supp [file elife-35656-supp-v1.zip › elife_poa_e35656_Figure_3_source_data_1.xlsx]

## Sheet: Sheet1
Slc17a6, Tac2, Tacr3 expression in Kiss1-ARH neurons
Data expressed in Fold Change
	Slc17a6	n=7
Animal #	OVX+Oil	OVX+E2
1	1.276	2.261
2	1.126	1.757
3	0.908	1.36
4	1.1	1.799
5	1.009	1.331
6	0.958	1.562
7	0.933	1.451
	1.06283	1.67833	mean
	0.0543669	0.140921	SEM
	Tac2	n=5
Animal #	OVX+Oil	OVX+E2
1	1.207	0.485
2	1.251	0.529
3	0.922	0.477
4	0.882	0.192
5	0.983	0.201
	1.049	0.3768	mean
	0.0755454	0.0741515	SEM
	Tacr3	n=4
Animal #	OVX+Oil	OVX+E2
1	1.215	0.202
2	1.125	0.082
3	1.172	0.145
4	0.676	0.089
	1.047	0.1295	mean
	0.125025	0.0279777	SEM
