# Supplementary material for: Estrogenic-dependent glutamatergic neurotransmission from kisspeptin neurons governs feeding circuits in females
Source: eLife journal article supplement (doi:10.7554/elife.35656), 2018-08-06
Supplement: supp [file elife-35656-supp-v1.zip › elife_poa_e35656_Figure_5_source_data_1.xlsx]

## Sheet: Figure 5D
The paired-pulse ratio (P2/P1)
Cell #	Oil	E2
1	0.83	0.16
2	1.19	0.29
3	0.89	0.62
4	0.8	0.61
5	1.18	0.81
6	0.72	0.54
7	0.69	0.58
8	0.89	0.76
9	1.06	0.2
10	0.85	0.75
11	0.76	0.6
	0.8964	0.5382	Mean
	0.05237	0.06771	SEM

## Sheet: Figure 5F
The paired-pulse ratio (P2/P1)
Cell #	Oil	E2
1	0.84	0.42
2	0.42	0.25
3	0.74	0.28
4	0.52	0.46
5	0.69	0.58
6	0.74	0.53
7	0.89	0.6
8	0.72	0.55
	0.695	0.4588	Mean
	0.0551	0.04726	SEM
