# Supplementary material for: Estrogenic-dependent glutamatergic neurotransmission from kisspeptin neurons governs feeding circuits in females
Source: eLife journal article supplement (doi:10.7554/elife.35656), 2018-08-06
Supplement: supp [file elife-35656-supp-v1.zip › elife_poa_e35656_Figure_6_source_data_1.xlsx]

## Sheet: Figure 6E
The paired-pulse ratio (P2/P1)
Cell #	Oil	E2
1	0.76	0.66
2	0.93	0.48
3	1.14	0.6
4	0.64	0.52
5	0.91	0.27
6	0.82	0.5
7	0.89	0.46
8		0.16
9		0.66
	0.87	0.4789	Mean
	0.05896	0.05628	SEM
