# Supplementary material for: Estrogenic-dependent glutamatergic neurotransmission from kisspeptin neurons governs feeding circuits in females
Source: eLife journal article supplement (doi:10.7554/elife.35656), 2018-08-06
Supplement: supp [file elife-35656-supp-v1.zip › elife_poa_e35656_Figure_7_source_data_1.xlsx]

## Sheet: Figure 7F
Effects of high-frequency stimulation of Kiss1Cre:GFP-ChR2 neurons on POMC and NPY neurons
Delta Vm (mV)
Cell #	POMC	NPY
1	14.7	-4
2	12.8	-6.1
3	3.3	-5.8
4	11.5	-5.52
5	7.22	-3.75
6	7.2	-13.3
7	9.88
	9.514	-6.412	Mean
	1.472	1.433	SEM
