# Supplementary material for: Estrogenic-dependent glutamatergic neurotransmission from kisspeptin neurons governs feeding circuits in females
Source: eLife journal article supplement (doi:10.7554/elife.35656), 2018-08-06
Supplement: supp [file elife-35656-supp-v1.zip › elife_poa_e35656_Figure_8_source_data_1.xlsx]

## Sheet: Figure 8B
Pomc, Grm1 and Grm5 mRNA expression in POMC neurons
Data expressed as % positive cells/animal
24 cells from each animal
Animal #	Pomc	Grm1	Grm5
1	100	40	28
2	100	58.33	12.5
3	100	29.17	12.5
4	100	58.33	29.17
5	100	33.33	20.83
	100	43.832	20.6	mean
	0	6.16577	3.60193	SEM

## Sheet: Figure 8D
Npy Grm2 and Grm7 mRNA expression in NPY neruons
Data expressed as % positive cells/animal
24 cells from each animal
Animal #	Npy	Grm7	Grm2
1	100	37.5	16.67
2	100	54.17	0
3	100	52.63	16.67
4	100	54.17	16.67
5	100	45.83
	100	48.86	12.5025	mean
	0	3.23137	4.1675	SEM
