# Supplementary material for: Estrogenic-dependent glutamatergic neurotransmission from kisspeptin neurons governs feeding circuits in females
Source: eLife journal article supplement (doi:10.7554/elife.35656), 2018-08-06
Supplement: supp [file elife-35656-supp-v1.zip › elife_poa_e35656_Figure_9_source_data_1.xlsx]

## Sheet: Figure 9D
Depolarizing effects of DHPG in POMC neurons in oil-treated and E2-treated, ovariectomized females
Delta Vm (mV)
Cell #	OiL	E2
1	24.6	14.5
2	22.8	8.31
3	4.5	23.8
4	8	13.92
5	3.96
6	31.57
7	4.29
8	2.88
9	4.07
10	22.03
11	11.84
	12.78	15.13	Mean
	3.155	3.209	SEM
