# Supplementary material for: Estrogenic-dependent glutamatergic neurotransmission from kisspeptin neurons governs feeding circuits in females
Source: eLife journal article supplement (doi:10.7554/elife.35656), 2018-08-06
Supplement: supp [file elife-35656-supp-v1.zip › elife_poa_e35656_Figure_10_source_data_1.xlsx]

## Sheet: Figure 10G
DCG-IV was more efficacious to hyperpolarize NPY neurons in E2-treated versus oil-treated, OVX females
Delta Vm (mV)
Cell #	OiL	E2
1	-3	-0.55
2	-7	0
3	-4	-3
4	0	-4
5	0	0
6	0	-12
7	-2	-3
8	-9	-7
9	0	-15
10	0	0
11	0	0
12	-4	-6.7
13	0	-6.6
14	0	-10
15	0	-4.5
16		0
17		-7.8
18		-12.3
19		-4
	-1.933	-5.076	Mean
	0.7526	1.081	SEM

## Sheet: Figure 10H
AMN082 was more efficacious than DCG-IV to hyperpolarize NPY neurons in E2-treated versus oil-treated
Delta Vm (mV)
Cell #	OiL	E2
1	-0.13	-0.68
2	0	-5.68
3	0	-7.65
4	0	-2.17
5	0	-16.27
6	0	-9.67
7	-7.73	-6.7
8	0.6	-7.63
9	0.57	-4.46
10		-12.36
	-0.7433	-7.327	Mean
	0.8778	1.465	SEM

## Sheet: Figure 10I
Grm7 mRNA expression in NPY neurons
Data expressed as fold change
Animal #	OVX+Oil	OVX+E2
1	1.177	2.078
2	1.021	2.4
3	1.124	1.567
4	1.076	2.021
5	1.057
	1.091	2.0165	mean
	0.0271717	0.171495	SEM
