# Supplementary material for: Estrogenic-dependent glutamatergic neurotransmission from kisspeptin neurons governs feeding circuits in females
Source: eLife journal article supplement (doi:10.7554/elife.35656), 2018-08-06
Supplement: supp [file elife-35656-supp-v1.zip › elife_poa_e35656_Figure_11_source_data_1.xlsx]

## Sheet: Figure 11G
Delta Vm (mV)	Slow EPSP (mV)
Cell #	OVX,Contr	OVX+E2, Contr	OVX, KO	OVX+E2,KO
1	21.4	12.58	18.9	3.5
2	10.8	10.82	11.2	2
3	13.3	8.54	5.87	8.07
4	6.63	4.5	3.99	5.57
5	10.38	8.73	28.65	0
6	9.8	10.96	9.56	3.37
7	13.6	2.81	9.38	4.98
8	15.23	0.7	13.06	3.17
9	17.43	0.98		1.65
10	15.23	3.36		2.73
11	27.83	4.67		1.82
12	22.64	6.84		1.29
13	11.87			0.53
14	7.9			0.76
15	4.24			4.97
16	10.86
17	26.06
18	9.7
19	11.47
	14.02	6.291	12.58	2.961	Mean
	1.48	1.165	2.798	0.5683	SEM
