# Supplementary material for: Estrogenic-dependent glutamatergic neurotransmission from kisspeptin neurons governs feeding circuits in females
Source: eLife journal article supplement (doi:10.7554/elife.35656), 2018-08-06
Supplement: supp [file elife-35656-supp-v1.zip › elife_poa_e35656_Figure_15_figure_supplement_1_source_data_1.xlsx]

## Sheet: Supplemental Fig1 A
CPP Time spent
Supplementary
Figure A
Intact Kiss2 Male Mice (n=15)
Time spent (s)
Animal ID	Pretest	Postest
1	270	364
2	357	449
3	320	378
4	234	284
5	306	369
6	249	284
7	253	382
8	268	272
9	299	303
10	313	541
11	378	441
12	317	354
13	353	390
14	387	536
15	382	544
M	312.4	392.733
SEM	13.1137	23.9433
Kisspeptin E2 Female Mice (n=8)
Time spent (s)
Animal ID	Pretest	Postest
1	319	251
2	336	516
3	347	486
4	240	209
5	208	339
6	358	286
7	396	401
8	162	329
M	295.75	352.125
SEM	29.0964	38.4886

## Sheet: Supplemental Fig1 B
Supplementary
Figure B
Intact Kiss2 Male Mice (n=15)
Sucrose Intake (g)
Animal ID	Day 2: Paired Sucrose	Day 4: Paired Sucrose	Day 6: Paired Sucrose	Day 8: Paired Sucrose
1	100	100	100	100
2	200	100	100	100
3	100	100	100	100
4	100	100	200	200
5	100	100	100	100
6	200	100	0	200
7	200	100	100	100
8	200	100	100	100
9	200	300	100	200
10	200	100	100	100
11	200	200	100	100
12	200	100	100	100
13	200	100	100	200
14	100	100	100	200
15	100	100	100	200
M	160	120	100	140
SEM	13.0931	14.4749	9.759	13.0931
Kisspeptin E2 Female Mice (n=8)
Sucrose Intake (g)
Animal ID	Day 2: Paired Sucrose	Day 4: Paired Sucrose	Day 6: Paired Sucrose	Day 8: Paired Sucrose
1	90	80	50	120
2	60	120	80	150
3	50	140	80	140
4	100	20	10	10
5	20	20	20	60
6	80	190	150	170
7	20	20	20	40
8	90	140	190	180
M	63.75	91.25	75	108.75
SEM	11.1704	23.4092	23.0682	22.5545
