# Supplementary material for: Estrogenic-dependent glutamatergic neurotransmission from kisspeptin neurons governs feeding circuits in females
Source: eLife journal article supplement (doi:10.7554/elife.35656), 2018-08-06
Supplement: supp [file elife-35656-supp-v1.zip › elife_poa_e35656_Figure_15_source_data_1.xlsx]

## Sheet: Figure 15 A
CPP Time Spent
Ovx Kiss2 Female Mice (n=8)
Time spent (s)
Animal ID	Pretest	Postest
1	323	235
2	429	611
3	384	416
4	261	367
5	233	72
6	438	532
7	417	512
8	127	244
M	326.5	373.625
SEM	39.4787	64.0053
Ovx HET Female Mice (n=4)
Time spent (s)
Animal ID	Pretest	Postest
1	271	360
2	356	444
3	421	525
4	147	351
M	298.75	420
SEM	59.1754	40.786
Ovx KO Female Mice (n=8)
Time spent (s)
Animal ID	Pretest	Postest
1	362	442
2	325	542
3	327	449
4	224	384
5	183	472
6	408	600
7	511	470
8	174	396
M	314.25	469.375
SEM	41.2093	25.4186

## Sheet: Figure 15 B
CPP Sucrose intake
Ovx Kiss2 Control Female Mice (n=8)
Sucrose intake (g)
Animal ID	Day 2	Day 4	Day 6	Day 8
1	100	100	100	100
2	0	100	100	100
3	100	100	0	100
4	100	200	100	200
5	100	100	200	100
6	100	100	100	100
7	0	100	100	100
8	100	200	200	100
M	75	125	112.5	112.5
SEM	16.3663	16.3663	22.6582	12.5
Ovx HET Female Mice (n=4)
Sucrose intake (g)
Animal ID	Day 2	Day 4	Day 6	Day 8
1	100	0	200	300
2	100	100	100	200
3	100	100	300	100
4	100	100	200	100
M	100	75	200	175
SEM	0	25	40.8248	47.8714
Ovx KO Female Mice (n=8)
Sucrose intake (g)
Animal ID	Day 2	Day 4	Day 6	Day 8
1	100	100	200	300
2	0	100	100	200
3	100	100	100	100
4	100	100	200	300
5	100	100	100	400
6	100	100	200	400
7	100	100	100	300
8	100	100	100	200
M	87.5	100	137.5	275
SEM	12.5	0	18.2981	36.5963

## Sheet: Figure 15 C
CPP Weight Gain (Day 10- Day 1)
Ovx Kiss2 Control Female Mice (n=8)
Weight Gain (g)
Animal ID	Day 10-Day 1
1	0.9
2	0.9
3	0.4
4	-0.1
5	0.6
6	-0.5
7	-0.2
8	0.2
M	0.275
SEM	0.182981
Ovx HET Female Mice (n=4)
Weight Gain (g)
Animal ID	Day 10-Day 1
1	1
2	0.7
3	1.2
4	1
M	0.975
SEM	0.103078
Ovx KO Female Mice (n=8)
Weight Gain (g)
Animal ID	Day 10-Day 1
1	0.5
2	1.1
3	0.4
4	1.3
5	0.6
6	0.9
7	0.6
8	0.8
M	0.775
SEM	0.109789

## Sheet: Figure 15 D
Slc17a6 mRNA expression in Kiss1-ARH neurons
Data expressed as fold change
Animal #	Control	Het
1	1.441	0.533
2	0.987	0.396
3	0.917	0.322
4	0.953	0.269
5	1.055
	1.0706	0.38	mean
	0.0953549	0.057264	SEM
