# Supplementary figures and images for: Estrogenic-dependent glutamatergic neurotransmission from kisspeptin neurons governs feeding circuits in females
Source: eLife journal article supplement (doi:10.7554/elife.35656), 2018-08-06

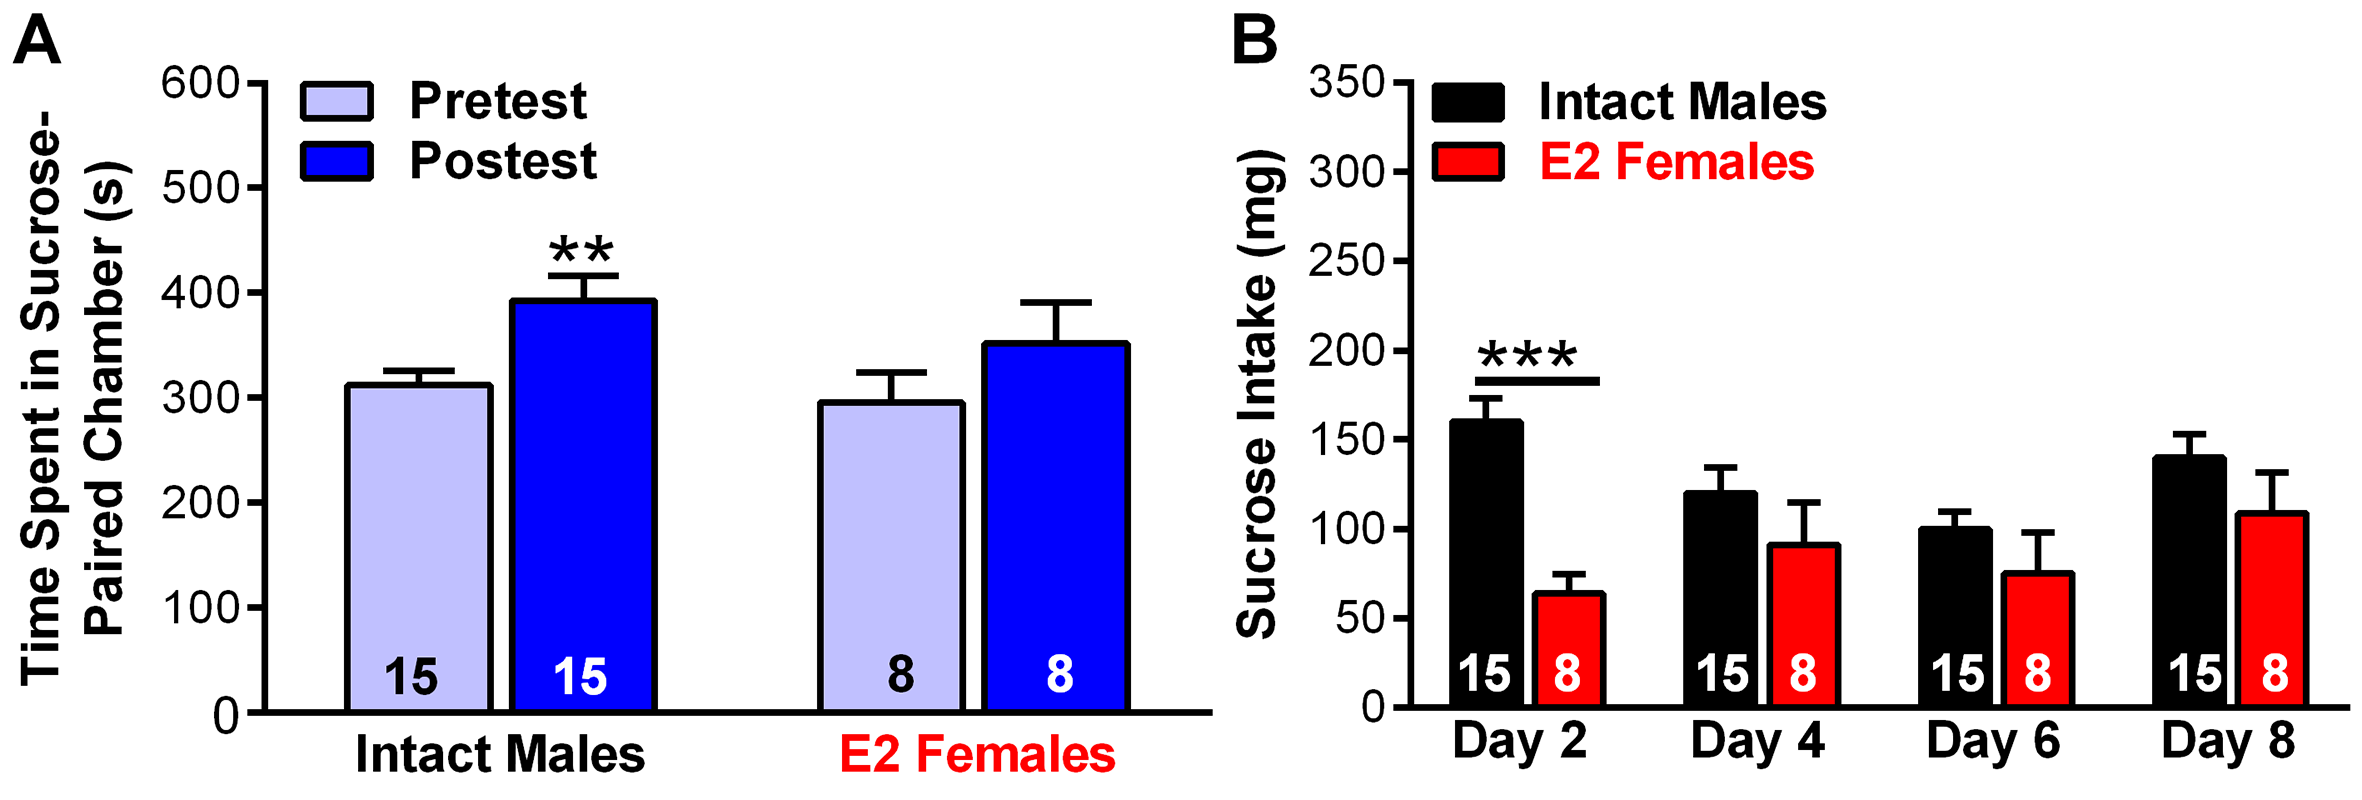

Supplement: supp [file elife-35656-supp-v1.zip › elife_poa_e35656_Figure_15_figure_supplement_1.tif]
